# Supplementary material for: Transcriptomic Analysis of Light-Induced Genes in Nasonia vitripennis: Possible Implications for Circadian Light Entrainment Pathways
Source: MDPI journal article supplement (doi:10.3390/biology12091215), 2023-09-06
Supplement: s1 [file s1]

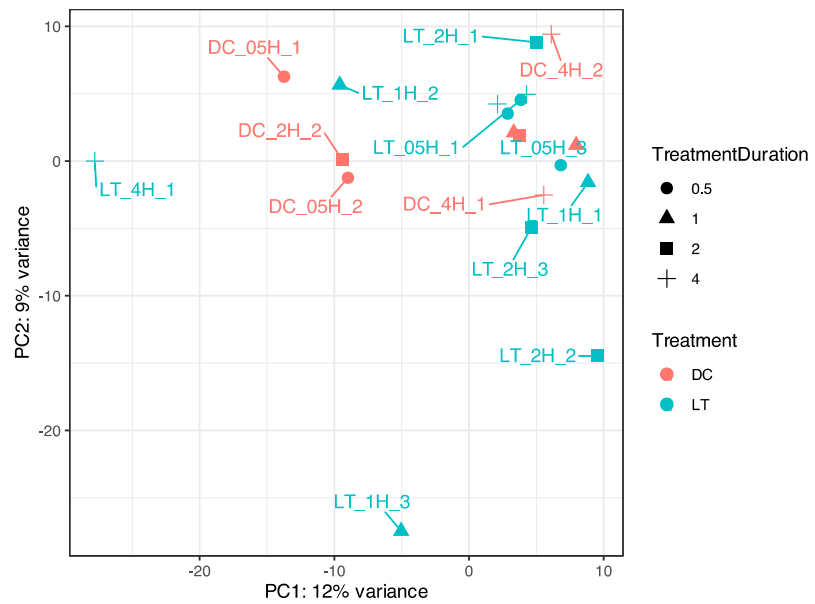

sample names (treatment\_treatment duration\_replicate) and are colored according to the treatment (DC = dark control, LT = light treatment). Shapes indicate the treatment duration—from 0.5 h to 4 h.

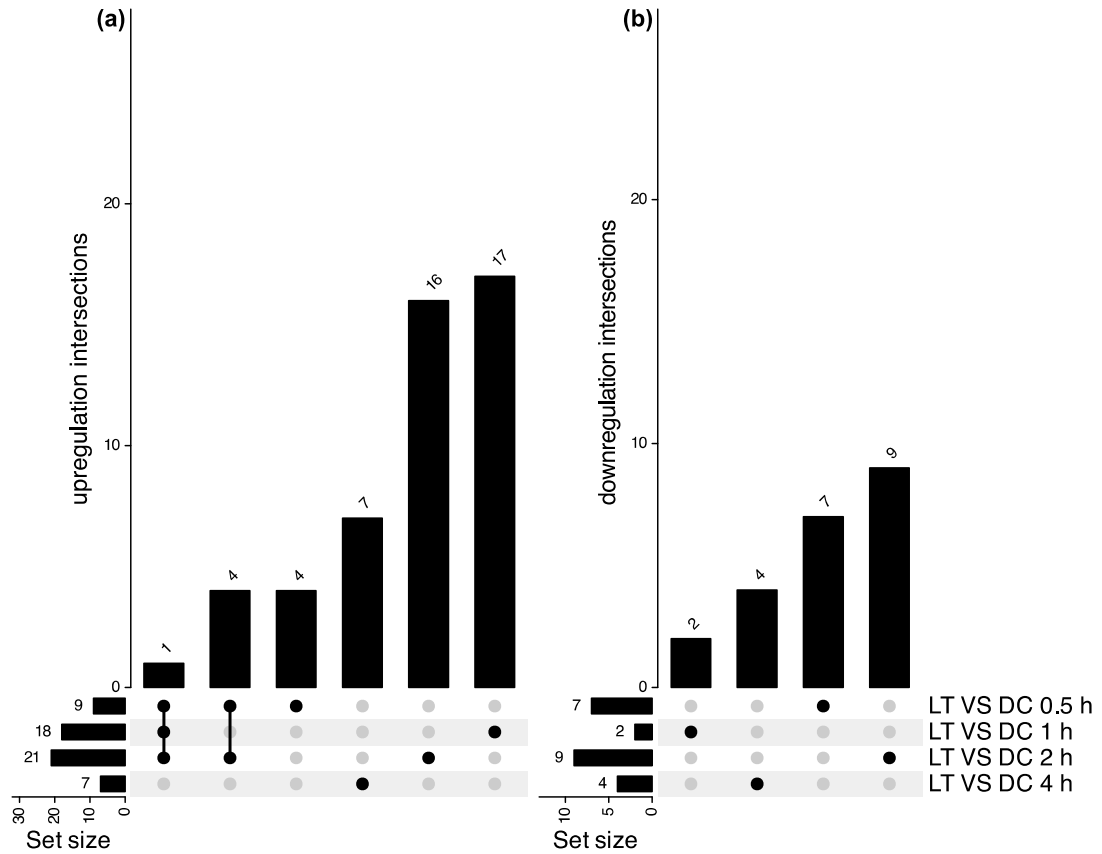

**Figure S2.** An intersection comparison of the Gene Ontology (GO) enrichment analysis of each time-point comparison presented in Figure 3. The horizontal

bars and numbers indicate the numbers of enriched GO terms in each light-dark comparison. The vertical bars and numbers indicate the similarities and differences in the enriched GO terms between different light-dark comparisons. The vertical black line connects modules that share common GO terms. (a) A comparison of the intersection-enriched GO terms in the upregulated DEGs. (b) The comparison of the intersection-enriched GO terms in the downregulated DEGs.

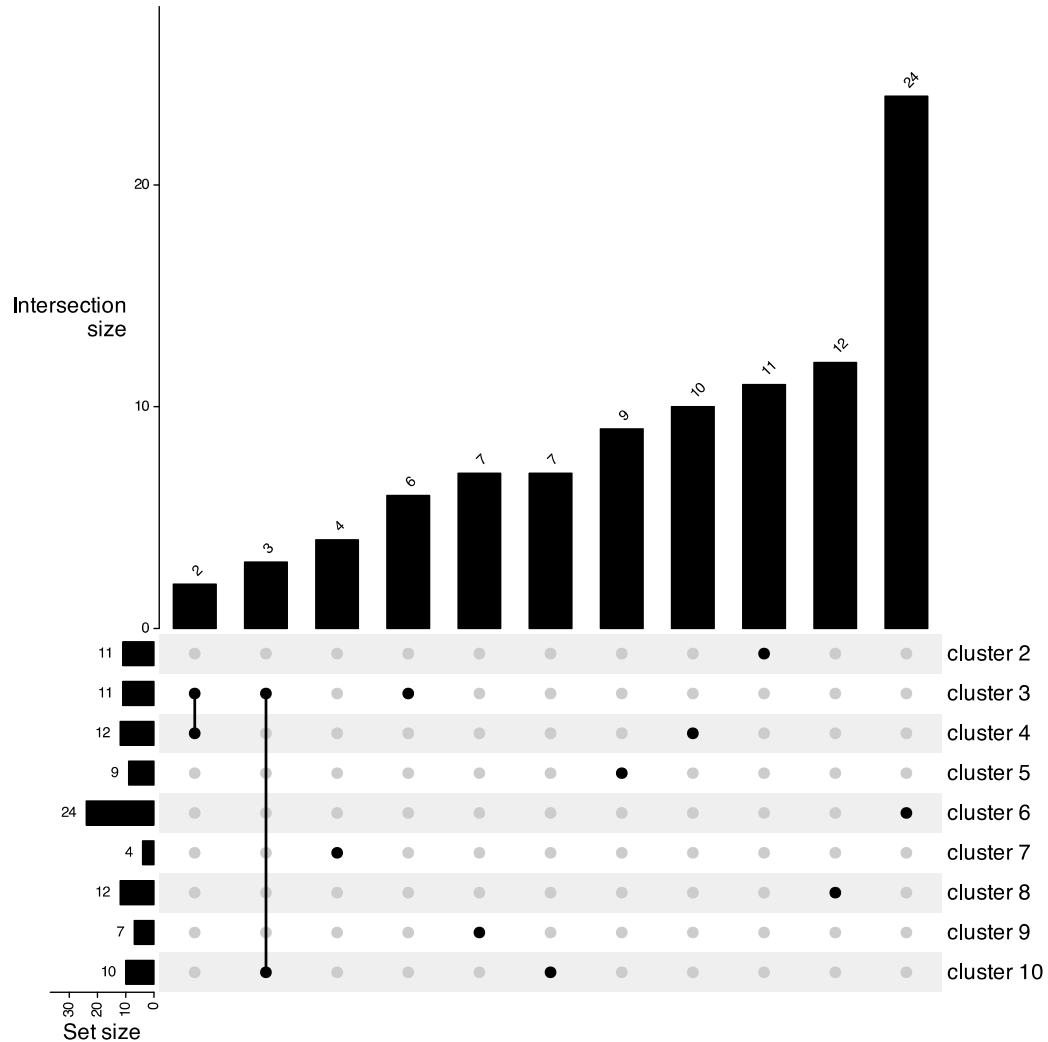

**Figure S3. An intersection comparison of the Gene Ontology (GO) enrichment analysis of the time-course clusters presented in Figure 5.** The horizontal bars and numbers indicate the numbers of enriched GO terms in each light-dark comparison. The vertical bars and numbers indicate the similarities and differences in the enriched GO terms between different light-dark comparisons. The vertical black line connects modules that shared common GO terms.

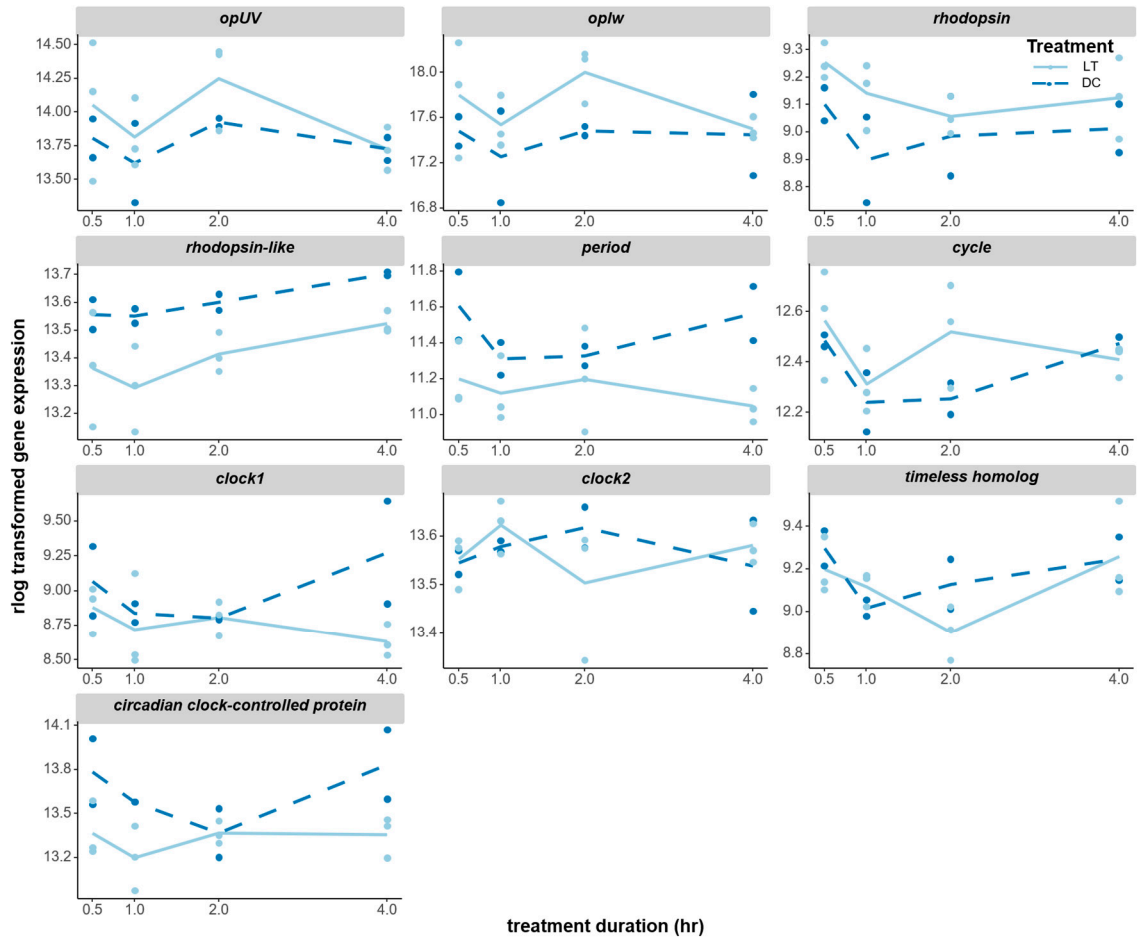

**Figure S4. Expression patterns of non-significant opsin and core clock genes.** *opUV* (LOC100124184) and *oplw* (*lop1*) encode for UV-sensitive and long-wavelength-sensitive opsins. *rhodopsin* (LOC100122696) and *rhodopsin-like* (LOC100122443) possibly encode for the fourth opsin in *Nasonia*. The core clock genes in *Nasonia* include *period*, *cycle*, *clock1* (LOC100123827), *clock2* (LOC100114103), and *timeless homolog* (LOC100121375). The expression levels of all of these photoreceptor genes, the core clock genes, and a circadian output gene, *circadian clock-controlled protein* (LOC100123404), were not significantly affected by light. The gene expression levels (raw counts) of these DEGs were normalized using rlog data transformation.
